# Supplementary material
Source: PubMed Central journal article supplement (PMC11386662)
Supplement: PBI-18-1598-s002.pdf [file PBI-18-1598-s002.pdf]

Fig.S1 Alignment of the 14.1-kb genomic DNA sequences from Jin5-508 (upper) and YN (lower). The pair-wise comparison was performed by using the ApE (v2.0.60) software with default parameters. The software is accessible from <http://jorgensen.biology.utah.edu/wayned/ape/>. The variants (SNPs and InDels) were highlighted in red. The blue nucleotide sequences are the three exons of CsGy7G014720 (CsFn17.1) while the orange nucleotide sequences are the the exon of CsGy7G014730.

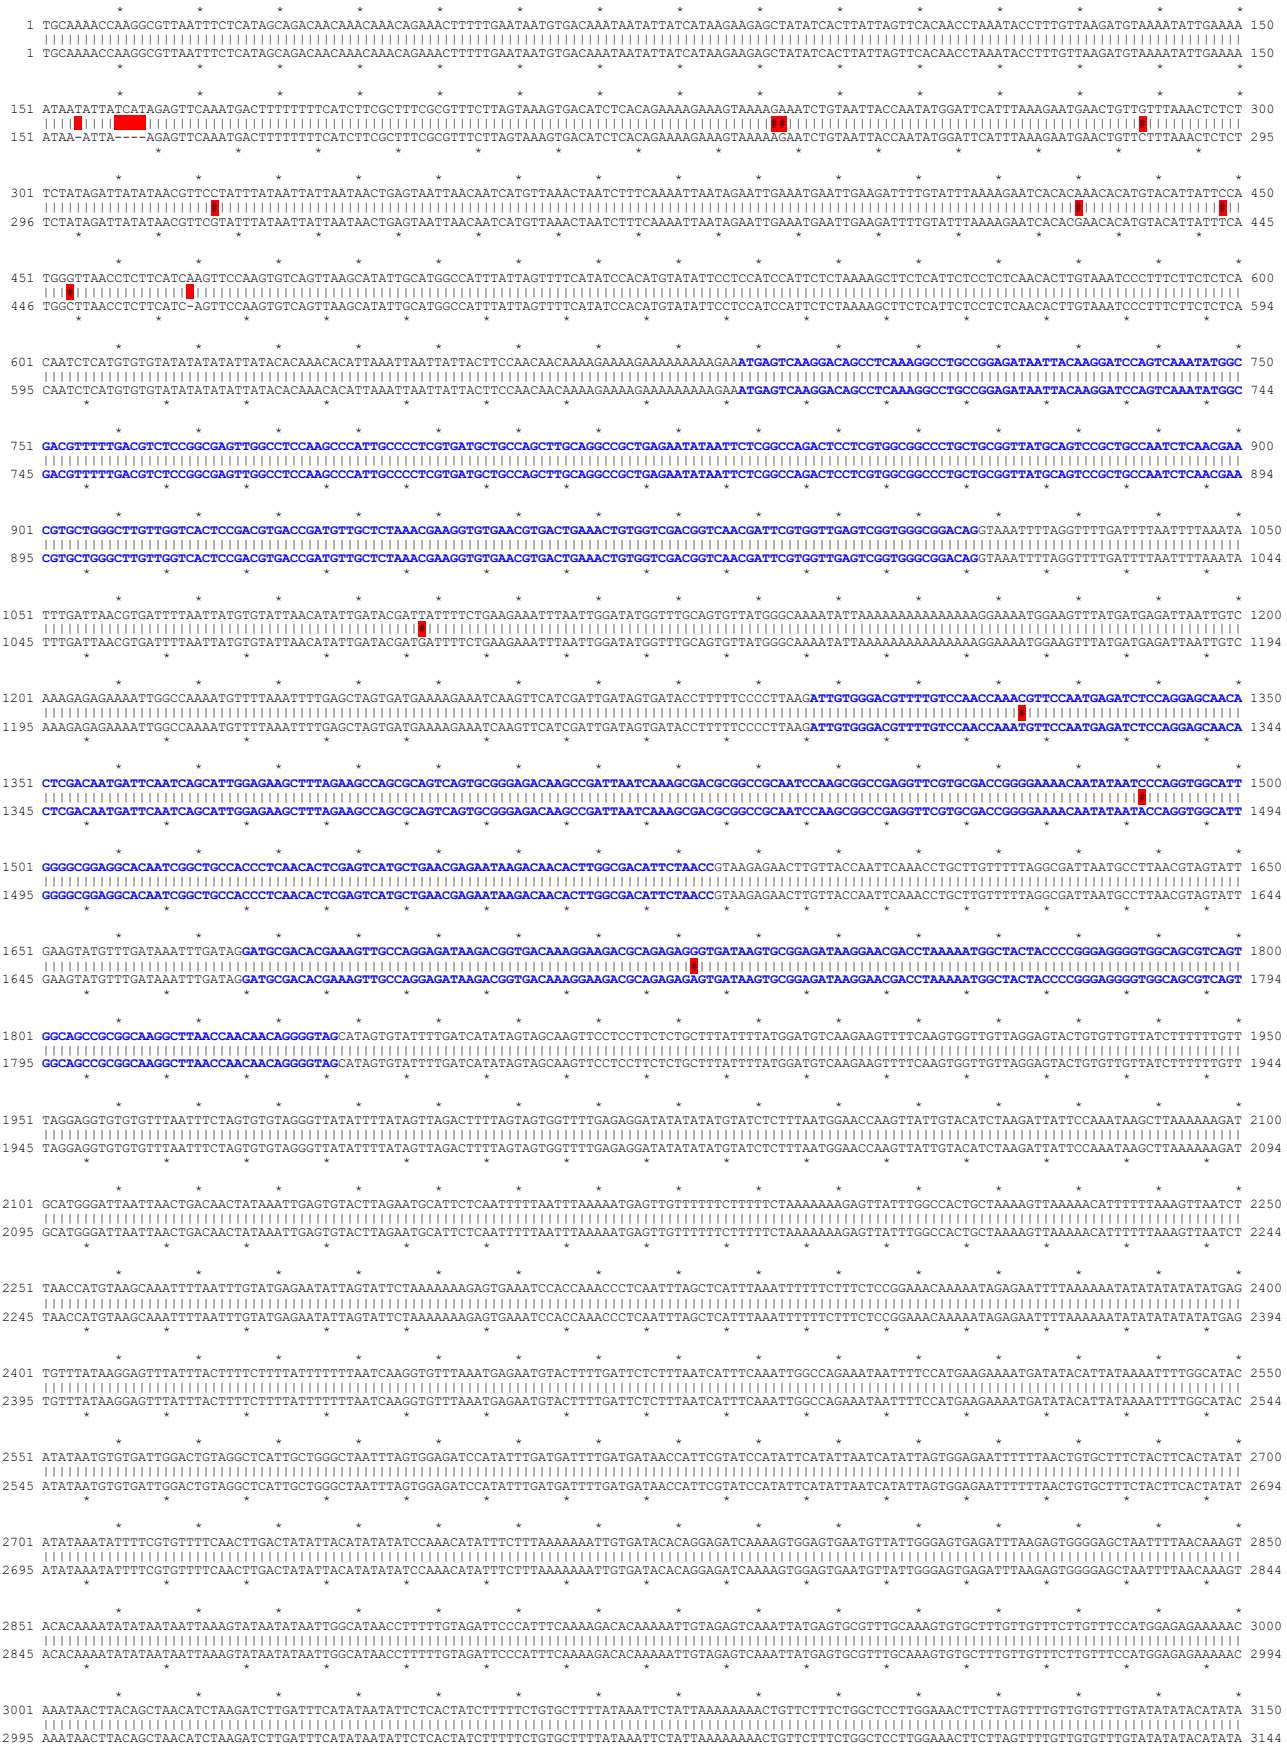







13351 AGGATTAGTTGGAATAAAAAGAACAAATAAGAACAGAAATACACAATGCCTTGAGAAAGTTATTATTACAGATACTTACATTAACACCTTTTGGTAAGAAGTGCCTGGAGTTGCAGCCACTCCTTTATTTATATATTAACATGAAATGATTA 13500  
13345 AGGATTAGTTGGAATAAAAAGAACAAATAAGAACAGAAATACACAATGCCTTGAGAAAGTTATTATTACAGATACTTACATTAACACCTTTTGGTAAGAAGTGCCTGGAGTTGCAGCCACTCCTTTATTTATATATTAACATGAAATGATTA 13494  
13501 TGTTTAAACACAGAAAATCATGTTTATAATTTTAAAATAAGCTATTCCAGGGTCACCTTGTAATAATTAACCTGATTCCAAGTCTTATCTGCCACAACAAAACATAAAGATGAATACACAAAAGAAGAAAGGATGTACAAGGCAATAGC 13650  
13495 TGTTTAAACACAGAAAATCATGTTTATAATTTTAAAATAAGCTATTCCAGGGTCACCTTGTAATAATTAACCTGATTCCAAGTCTTATCTGCCACAACAAAACATAAAGATGAATACACAAAAGAAGAAAGGATGTACAAGGCAATAGC 13644  
13651 ATTCCATAATAGAGCAATTAACCTTTTAAATTTACAGTAAACAGGAGGTTTCAAATGAACAGCCCTTTTGGCAATTTTGTAACTAAGAGAAACTTACAGCGCTCTCCAGAAGTGTGCCAGAAACAAAACCGGGATGTACAA 13800  
13645 ATTCCATAATAGAGCAATTAACCTTTTAAATTTACAGTAAACAGGAGGTTTCAAATGAACAGCCCTTTTGGCAATTTTGTAACTAAGAGAAACTTACAGCGCTCTCCAGAAGTGTGCCAGAAACAAAACCGGGATGTACAA 13794  
13801 ACCGTTTACCCCCAAGGTTAAATGACATGAACATAAAGTCAACCTGTCCCTAAACACTTACTCAAATGCACCATAAAGAAATCTAGAAAATATTTCTTTGGGGGAATCAGCGCGCGTGGATATCATCATCCCAAAAATGGC 13950  
13795 ACCGTTTACCCCCAAGGTTAAATGACATGAACATAAAGTCAACCTGTCCCTAAACACTTACTCAAATGCACCATAAAGAAATCTAGAAAATATTTCTTTGGGGGAATCAGCGCGCGTGGATATCATCATCCCAAAAATGGC 13944  
13951 ACTGGTTAGTAAGGCCAGCAAAAAGAGTTCTGCAACACGCATTCTCTGTAGTGGTAGCCAATGAAGATGCAAAAGGTCGAGACAAAAGGATATTAGTAGCTTGGTTTGACAGAATCATACCTGAAGGTTACCGCAACAAAACACTACATTCA 14100  
13945 ACTGGTTAGTAAGGCCAGCAAAAAGAGTTCTGCAACACGCATTCTCTGTAGTGGTAGCCAATGAAGATGCAAAAGGTCGAGACAAAAGGATATTAGTAGCTTGGTTTGACAGAATCATACCTGAAGGTTACCGCAACAAAACACTACATTCA 14094  
14101 GTTGTGCAATGGCGCAAAAAGAAAACCAAGCAGAAGCTAAGTTTTAGTAGAAGAGTGATCTATTATACAGTGTGGCATGTGTTAATCTGTGAAGCAGACTCCTGTTGATTTGGTAAACAGTTCATCTCAATTCCTCTGCTTCAGAGGTGA 14250  
14095 GTTGTGCAATGGCGCAAAAAGAAAACCAAGCAGAAGCTAAGTTTTAGTAGAAGAGTGATCTATTATACAGTGTGGCATGTGTTAATCTGTGAAGCAGACTCCTGTTGATTTGGTAAACAGTTCATCTCAATTCCTCTGCTTCAGAGGTGA 14244  
14251 AGATTTGATGATGCTCCAATCATCTTATCATCTCCAGGT 14295  
14245 AGATTTGATGATGCTCCAATCATCTTATCATCTCCAGGT 14289
