# Supplementary material
Source: PubMed Central journal article supplement (PMC11386662)

**Fig. S2** Alignment of the promoter sequences of Jin5-508 (upper) and YN (lower). The pair-wise comparison was performed by using the ApE (v2.0.60) software with default parameters. The software is accessible from <http://jorgensen.biology.utah.edu/wayned/ap/>. The variants (SNPs and InDels) were highlighted in red.

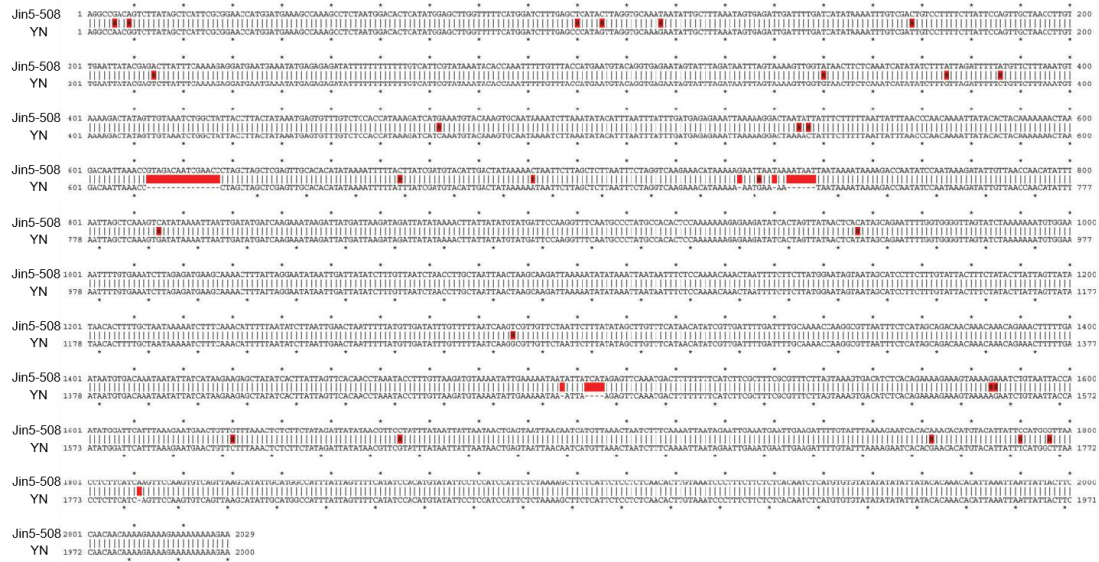

Supplement: PBI-18-1598-s003.pdf [file PBI-18-1598-s003.pdf]
